# Supplementary material
Source: HighWire-hosted journal article supplement (https://www.jrheum.org/highwire/filestream/41892/field_highwire_adjunct_files/0/210322DataSuppl.pdf)
Supplement: 210322DataSuppl.pdf [file 210322DataSuppl.pdf]

**Supplementary Table 1.** Dosing data for oral corticosteroids (prednisolone equivalent) (safety analysis population)

| Mean oral corticosteroid dose (mg/day) | Time relative to start of tacrolimus treatment |             |            |            |            |           |
|----------------------------------------|------------------------------------------------|-------------|------------|------------|------------|-----------|
|                                        | Day 0                                          | Month 1     | Month 3    | Month 6    | Month 12   | Month 24  |
| <b>All patients, n (%)</b>             | 168                                            | 160         | 139        | 133        | 112        | 90        |
| 0                                      | 32 (19.0)                                      | 3 (1.9)     | 0          | 0          | 0          | 4 (4.4)   |
| >0 to ≤10                              | 14 (8.3)                                       | 21 (13.1)   | 27 (19.4)  | 52 (39.1)  | 74 (66.1)  | 73 (81.1) |
| >10 to ≤20                             | 10 (6.0)                                       | 18 (11.3)   | 57 (41.0)  | 70 (52.6)  | 31 (27.7)  | 12 (13.3) |
| >20 to ≤30                             | 18 (10.7)                                      | 42 (26.3)   | 47 (33.8)  | 10 (7.5)   | 6 (5.4)    | 1 (1.1)   |
| >30                                    | 94 (56.0)                                      | 76 (47.5)   | 8 (5.8)    | 1 (0.8)    | 1 (0.9)    | 0         |
| Mean ± SD                              | 32.4 ± 21.6                                    | 31.3 ± 14.8 | 19.9 ± 8.6 | 13.6 ± 5.8 | 10.6 ± 6.5 | 7.6 ± 4.2 |
| <b>PM, n</b>                           | 46                                             | 44          | 37         | 34         | 29         | 22        |
| 0                                      | 6 (13.0)                                       | 2 (4.5)     | 0          | 0          | 0          | 1 (4.5)   |
| >0 to ≤10                              | 5 (10.9)                                       | 6 (13.6)    | 8 (21.6)   | 11 (32.4)  | 20 (69.0)  | 18 (81.8) |
| >10 to ≤20                             | 2 (4.3)                                        | 6 (13.6)    | 14 (37.8)  | 19 (55.9)  | 6 (20.7)   | 3 (13.6)  |
| >20 to ≤30                             | 5 (10.9)                                       | 11 (25.0)   | 11 (29.7)  | 3 (8.8)    | 2 (6.9)    | 0         |
| >30                                    | 28 (60.9)                                      | 19 (43.2)   | 4 (10.8)   | 1 (2.9)    | 1 (3.4)    | 0         |
| Mean ± SD                              | 35.1 ± 20.5                                    | 28.9 ± 14.4 | 20.5 ± 9.3 | 14.7 ± 7.0 | 11.7 ± 9.7 | 8.4 ± 3.4 |
| <b>Overall DM, n</b>                   | 122                                            | 116         | 102        | 99         | 83         | 68        |
| 0                                      | 26 (21.3)                                      | 1 (0.9)     | 0          | 0          | 0          | 3 (4.4)   |
| >0 to ≤10                              | 9 (7.4)                                        | 15 (12.9)   | 19 (18.6)  | 41 (41.4)  | 54 (65.1)  | 55 (80.9) |
| >10 to ≤20                             | 8 (6.6)                                        | 12 (10.3)   | 43 (42.2)  | 51 (51.5)  | 25 (30.1)  | 9 (13.2)  |
| >20 to ≤30                             | 13 (10.7)                                      | 31 (26.7)   | 36 (35.3)  | 7 (7.1)    | 4 (4.8)    | 1 (1.5)   |

|                      |             |             |             |            |            |           |
|----------------------|-------------|-------------|-------------|------------|------------|-----------|
| >30                  | 66 (54.1)   | 57 (49.1)   | 4 (3.9)     | 0          | 0          | 0         |
| Mean ± SD            | 31.5 ± 22.0 | 32.2 ± 14.9 | 19.7 ± 8.4  | 13.3 ± 5.2 | 10.2 ± 4.8 | 7.4 ± 4.5 |
| <b>CADM, n</b>       | 59          | 56          | 47          | 45         | 38         | 33        |
| 0                    | 19 (32.2)   | 0           | 0           | 0          | 0          | 1 (3.0)   |
| >0 to ≤10            | 4 (6.8)     | 11 (19.6)   | 13 (27.7)   | 20 (44.4)  | 25 (65.8)  | 28 (84.8) |
| >10 to ≤20           | 3 (5.1)     | 5 (8.9)     | 15 (31.9)   | 20 (44.4)  | 10 (26.3)  | 4 (12.1)  |
| >20 to ≤30           | 6 (10.2)    | 9 (16.1)    | 16 (34.0)   | 5 (11.1)   | 3 (7.9)    | 0         |
| >30                  | 27 (45.8)   | 31 (55.4)   | 3 (6.4)     | 0          | 0          | 0         |
| Mean ± SD            | 28.0 ± 24.5 | 32.9 ± 16.9 | 19.7 ± 10.1 | 13.7 ± 5.7 | 10.5 ± 5.3 | 6.6 ± 4.1 |
| <b>Classic DM, n</b> | 63          | 60          | 55          | 54         | 45         | 35        |
| 0                    | 7 (11.1)    | 1 (1.7)     | 0           | 0          | 0          | 2 (5.7)   |
| >0 to ≤10            | 5 (7.9)     | 4 (6.7)     | 6 (10.9)    | 21 (38.9)  | 29 (64.4)  | 27 (77.1) |
| >10 to ≤20           | 5 (7.9)     | 7 (11.7)    | 28 (50.9)   | 31 (57.4)  | 15 (33.3)  | 5 (14.3)  |
| >20 to ≤30           | 7 (11.1)    | 22 (36.7)   | 20 (36.4)   | 2 (3.7)    | 1 (2.2)    | 1 (2.9)   |
| >30                  | 39 (61.9)   | 26 (43.3)   | 1 (1.8)     | 0          | 0          | 0         |
| Mean ± SD            | 34.5 ± 19.0 | 31.6 ± 12.8 | 19.7 ± 6.6  | 12.9 ± 4.9 | 10.0 ± 4.4 | 8.1 ± 4.7 |

CADM, clinically amyopathic dermatomyositis; DM, dermatomyositis; PM, polymyositis; SD, standard deviation.
